# Supplementary material
Source: MDPI journal article supplement (https://www.mdpi.com/2410-3888/7/5/240)
Supplement: s1 [file s1]

Table S1. Characteristics of the included studies (n=48).

| Reference                             | Number of sample | Place of sample collection                                      | Nutrients considered for analysis                                                                                                 |
|---------------------------------------|------------------|-----------------------------------------------------------------|-----------------------------------------------------------------------------------------------------------------------------------|
| Akther et al. (2018) [32]             | 5                | Riverbank (The Padma) and fish landing centers of Rajshahi city | Proximate composition: moisture, protein, fat<br>Minerals: iron, calcium, phosphorus                                              |
| Al-Reza et al. (2015) [33]            | 1                | The river Jamuna                                                | Proximate composition: moisture, carbohydrate, protein, fat, ash                                                                  |
| Azam et al. (2003) [34]               | 14               | Kuakata                                                         | Proximate composition: moisture, protein, fat, ash                                                                                |
| Begum et al. (2011) [35]              | 1                | Dhaka city                                                      | Proximate composition: moisture, protein, fat, ash                                                                                |
| Begum et al. (2014) [36]              | 1                | Directly from the fish processor (location is not specified)    | Proximate composition: moisture, protein, fat, ash                                                                                |
| Bhuiyan et al. (2009) [37]            | 6                | Karwan Bazaar, Dhaka and drying yards of Sonadia island         | Proximate composition: moisture, carbohydrate, protein, fat, ash                                                                  |
| Chakroborty & Chakroborty (2017) [38] | 1                | K.R. market, Bangladesh Agricultural University, Mymensingh     | Proximate composition: moisture, protein, fat, ash                                                                                |
| Debnath et al. (2018) [39]            | 1                | Sureswar Bazar, Shariatpur and Fishery Ghat, Chittagong         | Proximate composition: moisture, protein, fat, ash<br>Minerals: iron, calcium, phosphorus                                         |
| Farid et al. (2016) [40]              | 3                | Meghna river                                                    | Proximate composition: moisture, protein, fat, ash<br>Minerals: iron, zinc, calcium, magnesium, manganese,<br>Heavy metal: copper |
| Farid et al. (2017) [41]              | 2                | Meghna river                                                    | Proximate composition: moisture, protein, fat, ash                                                                                |
| Flowra, Tumpa, and Islam (2012) [42]  | 5                | Saidpur, Nilphamari                                             | Proximate composition: moisture, protein, fat, ash                                                                                |
| Flowra and Tumpa (2012) [43]          | 5                | Chalan beel, Shingra                                            | Proximate composition: moisture, protein, fat, ash                                                                                |
| Haque et al. (2013) [44]              | 2                | Kutubdia, Shaparirdip, Cox'bazar, Chakti, Kazidewry             | Proximate composition: moisture, protein, fat, ash                                                                                |
| Hasan et al. (2006) [45]              | 3                | Mymensingh                                                      | Proximate composition: moisture, protein, fat, ash                                                                                |

| Reference                            | Number of sample | Place of sample collection                    | Nutrients considered for analysis                                                                                    |
|--------------------------------------|------------------|-----------------------------------------------|----------------------------------------------------------------------------------------------------------------------|
| Hasan et al. (2016) [46]             | 4                | Sylhet Sadar                                  | Proximate composition: moisture, protein, fat, ash                                                                   |
| Hasan et al. (2018) [47]             | 1                | Sylhet Sadar                                  | Proximate composition: moisture, protein, fat, ash, dietary fiber                                                    |
| Hossain et al. (2015) [48]           | 4                | Dhaka city                                    | Proximate composition: moisture, protein, fat, ash                                                                   |
| Hossain et al. (2017) [49]           | 2                | Cox's Bazar                                   | Proximate composition: moisture, protein, fat, ash<br>Minerals: zinc<br>Heavy metal: copper, cadmium, lead, chromium |
| Huque et al. (2013) [50]             | 3                | Local fish market (location is not specified) | Proximate composition: moisture, carbohydrate, protein, fat, ash<br>Minerals: calcium, phosphorus                    |
| Imtiaz et al. (2017) [51]            | 1                | Cox's Bazar                                   | Proximate composition: moisture, protein, fat, ash                                                                   |
| Islam et al. (2006) [52]             | 3                | Not mentioned                                 | Proximate composition: moisture, protein, fat, ash                                                                   |
| Islam et al. (2007) [53]             | 1                | Dhaka Newmarket and Hatirpul market, Dhaka    | Proximate composition: moisture, protein, fat, ash                                                                   |
| Islam, Hossain, and Mian (2012) [54] | 1                | Sylhet                                        | Proximate composition: moisture, protein, fat, ash                                                                   |
| Islam et al. (2013) [55]             | 4                | Singra, Natore                                | Proximate composition: moisture, carbohydrate, protein, fat, ash                                                     |
| Islam et al. (2020) [56]             | 3                | Vodra, Rajshahi city                          | Proximate composition: moisture                                                                                      |
| Islam et al. (2021) [57]             | 13               | Saint martin's island                         | Proximate composition: moisture, fat, ash<br>Fatty acid: lauric, myristic, palmitic, palmitoleic, stearic, oleic     |
| Jahan et al. (2017) [58]             | 5                | Rajshahi city                                 | Proximate composition: moisture, carbohydrate, protein, fat, ash<br>Minerals: iron, calcium, phosphorus              |
| Jahan and Akhtar (2019) [59]         | 1                | Singrabajar of Chalanbeel area                | Proximate composition: moisture, protein, fat, ash                                                                   |
| Jamil et al. (2017) [60]             | 2                | Cox's Bazaar                                  | Proximate composition: moisture, protein, fat, ash                                                                   |

| Reference                                | Number of sample | Place of sample collection                                    | Nutrients considered for analysis                                                                                                     |
|------------------------------------------|------------------|---------------------------------------------------------------|---------------------------------------------------------------------------------------------------------------------------------------|
|                                          |                  |                                                               | Minerals: zinc<br>Heavy metals: copper, cadmium, lead, chromium                                                                       |
| Kar et al. (2020) [61]                   | 6                | Khulna (Dubla Island), Patuakhali (Kuakata) and Cox's Bazar   | Proximate composition: moisture, protein, fat, ash<br>Minerals: iron, zinc<br>Heavy metals: copper, arsenic, lead                     |
| Mahmud et al. (2019) [62]                | 5                | Jessore Sadar                                                 | Proximate composition: energy, moisture, carbohydrate, protein, fat, ash<br>Minerals: iron, calcium, phosphorus<br>Heavy metals: lead |
| Majumdar et al. (2017) [63]              | 6                | Kawran Bazar Fish Market, Dhaka                               | Proximate composition: moisture, protein, fat, ash                                                                                    |
| Majumdar et al. (2018) [64]              | 1                | Not mentioned                                                 | Proximate composition: moisture, protein, fat, ash                                                                                    |
| Mohammad et al. (2013) [21]              | 3                | Mymensingh town                                               | Proximate composition: moisture, protein, fat, ash<br>Heavy metals: cadmium, chromium                                                 |
| Mansur et al. (2017) [65]                | 3                | Mymensingh city                                               | Proximate composition: moisture, protein, fat, ash<br>Minerals: zinc<br>Heavy metals: copper, cadmium, lead, chromium                 |
| Nurullah et al. (2006) [66]              | 6                | Mymensingh                                                    | Proximate composition: moisture, protein, fat, ash                                                                                    |
| Prodhan et al. (2010) [67]               | 1                | Kawran Bazar, Dhaka                                           | Proximate composition: moisture, protein, fat, ash                                                                                    |
| Rahman et al. (2016) [68]                | 2                | Mechua Bazar, Mymensingh and BFDC landing centre, Cox's Bazar | Proximate composition: moisture, protein, fat, ash                                                                                    |
| Rana, Chakraborty, and Saeid (2020) [69] | 10               | Different market of Dhaka city                                | Proximate composition: moisture, protein, fat, ash                                                                                    |
| Rasul et al. (2018) [70]                 | 1                | Gazipur                                                       | Proximate composition: moisture, protein, fat, ash                                                                                    |
| Rasul et al. (2019) [71]                 | 1                | Gazipur                                                       | Proximate composition: moisture, protein, fat, ash                                                                                    |
| Rasul et al. (2021) [72]                 | 1                | Gazipur                                                       | Proximate composition: moisture, protein, fat, ash                                                                                    |

| Reference                      | Number of sample | Place of sample collection                                      | Nutrients considered for analysis                                                                                                               |
|--------------------------------|------------------|-----------------------------------------------------------------|-------------------------------------------------------------------------------------------------------------------------------------------------|
|                                |                  |                                                                 | Fatty acid: SFAs, MUFAs, PUFAs, myristic acid, palmitic acid, stearic acid, oleic acid, linoleic acid, linolenic acid, arachidic acid, EPA, DHA |
| Shaheen et al. (2013) [22]     | 4                | Not mentioned                                                   | Heavy metals: copper<br>Vitamins: D, E, folate, A, B <sub>1</sub> , B <sub>2</sub> , B <sub>3</sub> , B <sub>6</sub> ,                          |
| Sharif et al. (1991) [73]      | 8                | Coastal belt of the Bay of Bengal                               | Heavy metals: copper, nickel, rubidium, strontium, cadmium, lead                                                                                |
| Sharif et al. (1993) [74]      | 10               | Coastal belt of the Bay of Bengal                               | Minerals: iron, zinc, calcium, magnesium, sodium, potassium, manganese<br>Heavy metals: copper, nickel, rubidium, strontium, cadmium, lead      |
| Siddiky et al. (2017) [75]     | 5                | Cox's Bazar                                                     | Proximate composition: moisture, protein, fat, ash                                                                                              |
| Siddique and Aktar (2011) [18] | 3                | Chaktai, Asadgonj, Firingi bazar, Reajuddin Bazar of Chittagong | Proximate composition: moisture, carbohydrate, protein, fat, ash                                                                                |
| Sultana et al. (2008) [76]     | 3                | Chittagong                                                      | Proximate composition: moisture, protein, fat, ash                                                                                              |
