# Supplementary material
Source: MDPI journal article supplement (https://www.mdpi.com/2410-3888/7/5/240)
Supplement: s1 [file s1]

Archive with 3 entries (3 files):
- Calculation of RNI.xlsx
- Data extraction-final version.xlsx
- Table S1. Characteristics of the included studies (n=48)..pdf
