# Supplementary material
Source: MDPI journal article supplement (https://www.mdpi.com/2410-3888/7/5/240)
Supplement: s1 [file s1 › Calculation of RNI.xlsx]

## Sheet: Sheet1
Protein
		Churi (Trichiurus savala)		Bele (Awaous grammepomus)		Taki (Channa punctata)		Bele (Glossogobius giuris)		Punti (Puntius puntio)		Thai Pangas (Pangasianodon hypophthalmus)		Tilapia (Oreocbromis mossambicus)
Target group	RNI (g)	Amount per serving (25g/50g)	% RNI	Amount per serving (25g/50g)	% RNI	Amount per serving (25g/50g)	% RNI	Amount per serving (25g/50g)	% RNI	Amount per serving (25g/50g)	% RNI	Amount per serving (25g/50g)	% RNI	Amount per serving (25g/50g)	% RNI
6-12m children	14.45	19.42	134.394	18.95	131.142	18.34	126.92	18.33	126.851	18.23	126.159	4	27.6817	5.2	35.9862
12-24m children	16.7	19.42	116.287	18.95	113.473	18.34	109.82	18.33	109.76	18.23	109.162	4	23.9521	5.2	31.1377
Pregnant women	78	38.84	49.7949	37.9	48.5897	36.68	47.0256	36.66	47	36.45	46.7308	8	10.2564	10.4	13.3333
Lactating women	71	38.84	54.7042	37.9	53.3803	36.68	51.662	36.66	51.6338	36.45	51.338	8	11.2676	10.4	14.6479
Iron
		Olua (Coilia neglecta)		Bata (Cirrhina reba)		Loitta (Harpadon nehereus)		Kachki (Corica soborna)		Churi (Trichiurus lepturus)		Thai Pangas (Pangasianodon hypophthalmus)		Telapia (Oreocbromis mossambicus)
Target group	RNI (mg)	Amount per serving (25g/50g)	% RNI	Amount per serving (25g/50g)	% RNI	Amount per serving (25g/50g)	% RNI	Amount per serving (25g/50g)	% RNI	Amount per serving (25g/50g)	% RNI	Amount per serving (25g/50g)	% RNI	Amount per serving (25g/50g)	% RNI
6-12m children	9.3	11.28	121.29	10	107.527	9.54	102.581	7.75	83.3333	7.28	78.2796	0.17	1.82796	0.13	1.39785
12-24m children	5.8	11.28	194.483	10	172.414	9.54	164.483	7.75	133.621	7.28	125.517	0.17	2.93103	0.13	2.24138
Pregnant women	29.4	22.55	76.7007	20	68.0272	19.07	64.8639	15.5	52.7211	14.56	49.5238	0.35	1.19048	0.25	0.85034
Lactating women	15	22.55	150.333	20	133.333	19.07	127.133	15.5	103.333	14.56	97.0667	0.35	2.33333	0.25	1.66667
Zinc
		Tengra (Mystus tengra)		Kata mach (Osteogeniosus militaris)		Lakhua (Polynemus indicus)		Kachki (Amblypharringodon microlepin)		Rita (Rit rita)		Thai Pangas (Pangasianodon hypophthalmus)		Telapia (Oreocbromis mossambicus)
Target group	RNI (mg)	Amount per serving (25g/50g)	% RNI	Amount per serving (25g/50g)	% RNI	Amount per serving (25g/50g)	% RNI	Amount per serving (25g/50g)	% RNI	Amount per serving (25g/50g)	% RNI	Amount per serving (25g/50g)	% RNI	Amount per serving (25g/50g)	% RNI
6-12m children	4.1	4.83	117.805	2.99	72.9268	2.8	68.2927	2.61	63.6585	1.97	48.0488	0.16	3.90244	0.35	8.53659
12-24m children	4.1	4.83	117.805	2.99	72.9268	2.8	68.2927	2.61	63.6585	1.97	48.0488	0.16	3.90244	0.35	8.53659
Pregnant women	7.5	9.65	128.667	5.97	79.6	5.59	74.5333	5.23	69.7333	3.94	52.5333	0.33	4.4	0.7	9.33333
Lactating women	8.5	9.65	113.529	5.97	70.2353	5.59	65.7647	5.23	61.5294	3.94	46.3529	0.33	3.88235	0.7	8.23529
Calcium
		Chela (Salmostoma acinaces)		Olua (Coilia neglecta)		Bata (Cirrhina reba)		Punti (Puntius ticto)		Khailsa (Colisa fasciata)		Thai Pangas (Pangasianodon hypophthalmus)		Telapia (Oreocbromis mossambicus)
Target group	RNI (mg)	Amount per serving (25g/50g)	% RNI	Amount per serving (25g/50g)	% RNI	Amount per serving (25g/50g)	% RNI	Amount per serving (25g/50g)	% RNI	Amount per serving (25g/50g)	% RNI	Amount per serving (25g/50g)	% RNI	Amount per serving (25g/50g)	% RNI
6-12m children	400	897.5	224.375	776.15	194.037	694.1	173.525	632.5	158.125	627.5	156.875	2.15	0.5375	4.75	1.1875
12-24m children	500	897.5	179.5	776.15	155.23	694.1	138.82	632.5	126.5	627.5	125.5	2.15	0.43	4.75	0.95
Pregnant women	1200	1795	149.583	1552.3	129.358	1388.2	115.683	1265	105.417	1255	104.583	4.3	0.358333	9.5	0.791667
Lactating women	1000	1795	179.5	1552.3	155.23	1388.2	138.82	1265	126.5	1255	125.5	4.3	0.43	9.5	0.95
