# Supplementary material
Source: MDPI journal article supplement (https://www.mdpi.com/2410-3888/7/5/240)
Supplement: s1 [file s1 › Data extraction-final version.xlsx]

## Sheet: Macronutrients
Author, year (for example Shaheen, 2013)	Local name of the fish	Scientific name	Common name/English name	Tissue sampled (whole, head, muscle, bone, fin etc.)	Energy (Kcal/100g)	Moisture/water (g/100g)	Carbohydrate (g/100g)	Protein (g/100g)	Fat/lipid (g/100g)	Ash/minerals (g/100g)	Dietary fiber (g/100g)	Remarks
Akther, 2018	Bele	Glossogobius giuris	Scribbled goby	Muscle		14.28		73.32	14.05			Incomplete data
Akther, 2018	Bacha	Eutropiichtheys vacha	Batchwa vacha	Muscle		13.4		66.28	1.29			Incomplete data
Akther, 2018	Kachki	Corica soborna	Ganges river sprat	Muscle		12.05		65.32	23.63			Incomplete data
Akther, 2018	Punti	Puntius ticto	Small freshwater fish	Muscle		13		60	9.58			Incomplete data
Akther, 2018	Khailsa	Colisa fasciata	Giant gourami	Muscle		13.9		57.76	20.19
Al-Reza, 2015	Chela	Laubuka dadiburjori	Silver razorbelly minnow	Muscle		5.88	4.01	62.8	14	8.91		Incomplete data
Azam, 2003	Parshe	Mugil cephalus	Flathead grey mullet	Whole		19.93		68.09	4.87	7.45		Not relevant
Azam, 2003	Tangra	Arius caelatus	Tyangra	Whole		19.22		66.52	9.03	5.08
Azam, 2003	Rupchanda	Pampus chinenchis	Pomfret	Whole		18.23		63.49	7.1	10.91
Azam, 2003	Phasa	Setipinna phasa	Gangetic hairfin anchovy	Whole		24.46		62.36	3.67	9.51
Azam, 2003	Loytta	Harpodon nehereus	Bombay duck	Whole		21.26		61.25	3.5	15.02
Azam, 2003	Bole	Epinephelus lanceolatus	Giant grouper	Whole		23.19		61.24	7.94	6.32
Azam, 2003	Kamot	Scoliodon sorrakowah	Cuvier	Whole		23.49		58.35	7.84	11.32
Azam, 2003	Potka	Tetraoclon patoka		Whole		23.31		57.51	9.69	7.22
Azam, 2003	Taposhi	Polynemus paradiseus	Cichlid	Whole		21.65		57.25	8.95	12.14
Azam, 2003	Samuddrik baim	Muraenesox hagio	Pike eel	Whole		20.98		56.77	11.19	9.98
Azam, 2003	Kukurjib	Cynoglossus bengalensis	Bengal tongue sole	Whole		21.7		54.86	11.44	11.85		Not relevant (Fish Powder)
Azam, 2003	Shaplapata	Himantura walga		Whole		21.08		54.19	25.3	11.01		Sample from Cox'sbazar took
Azam, 2003	Churi	Trichuirus haumella	Ribbon fish	Whole		23.61		53.85	11.71	10.78		Sample from Cox'sbazar took
Azam, 2003	Hilsha	Hilsa ilisha	Hilsa	Whole		23.9		40.69	26.13	9.11
Begum, 2011	Tengra	Mystus vittatus		Whole		16.01		60.45	9.25	9.33
Begum, 2011	Tengra	Mystus vittatus	Tyangra	Whole		22.41		53.63	10.33	13.23		Sample from Cox'sbazar took
Begum, 2014	Chanda	Chanda Nama	Pomfret	Whole		7.53		56.8	24.39	14.72
Bhuiyan, 2009	Chhuri	Trichiurus haumela	Ribbon fish	Whole		25.68	2.79	64.51	1.67	5.35
Bhuiyan, 2009	Loitta	Harpodon nehereus	Bombay duck	Whole		29.14	2.68	61.22	1.87	5.09
Bhuiyan, 2009	Poa	Otolithoides pama	Croaker	Whole		28.5	3.42	57.91	3.73	6.44
Bhuiyan, 2009	Phasa	Setipinna phasa	Anchovy	Whole		23.34	1.13	47.84	23.91	3.78		0 day of stored sample took
Bhuiyan, 2009	Rupchanda	Stromateus chinensis	Chinese pomfret	Whole		43.03	2.65	46.46	4.42	3.44
Bhuiyan, 2009	Lakhua	Eleutheronema tetradactylum	Indian salmon	Whole		41.02	1.94	42.5	14.33	0.21		Solar dried sample took
Chakroborty, 2017	Carp	Cyprinus carpio var. specularis	Mirror carp	Muscle		26.37		64.82	20.11	13.9
Debnath, 2018	Ilish	Tenualosa ilisha	Hilsa	Abdomen		33.51		28.51	23.31	3.95
Debnath, 2018	Ilish	Tenualosa ilisha	Hilsa	Caudal		31.27		26.73	19.18	7.5		0 day of stored sample took
Farid, 2016	Taki	Channa punctatus	Spotted snakehead	Muscle		12.72		46.06	7.09	34.29		Sun-dried sample took
Farid, 2016	Tengra	Mystus tengra	Tyangra	Muscle		6.08		42.6	15.58	35.6		Solar dried sample took
Farid, 2016	Shol	Channa striata	Snakehead murrel	Muscle		30.92		41	4.79	22.41
Farid, 2017	Taki	Channa punctatus		Muscle		9.77		47.69	7.47	35.16
Farid, 2017	Tengra	Mystus tengra		Muscle		4.9		43	15.99	36.2		Solar dried sample took
Flowra, 2012(a)	Churi	Trichiurus haumela	Ribbon fish	Whole		14.06		65.65	8.42	9.63
Flowra, 2012(a)	Kachki	Corica soborna	Ganges river sprat	Whole		24.58		51.23	12.86	22.51
Flowra, 2012(a)	Chanda	Chanda nama	Pomfret	Whole		22.56		48.96	15.31	19.23
Flowra, 2012(b)	Chingri	Palaemon sp	Shrimp	Whole		18.18		51.19	11.53	15.67
Flowra, 2012(b)	Punti	Puntius ticto	Small freshwater fish	Whole		12.13		47.32	9.47	11.27
Flowra, 2012(b)	Bata	Labeo bata	Bata	Whole		12.35		45.72	5.38	10.78		Sun-dried sample took
Flowra, 2012(b)	Shol	Channa striatus	Snakehead murrel	Whole		16.03		33.23	8.96	13.72
Flowra, 2012(b)	Boal	Wallago attu	Wallago	Whole		14.7		28.2	15.86	13.33
Haque, 2013	Loitta	Harpodon nehereus	Bombay Duck	Whole		19.08		54.58	6.98	18.64		Not relevant (Fish Powder)
Haque, 2013	Rupchada	Pampus argenteus	Silver Pomfret	Whole		20.42		54.32	7.18	16.95
Haque, 2013	Loitta	Harpodon nehereus	Bombay duck	Whole		23.61		52.49	5.16	20.32
Haque, 2013	Loitta	Harpodon nehereus	Bombay Duck	Whole		21.39		50.66	6.24	18.71
Haque, 2013	Rupchada	Pampus argenteus	Silver Pomfret	Whole		22.48		49.84	6.46	19.4		Not relevant (Fish Powder)
Haque, 2013	Rupchada	Pampus argenteus	Silver pomfret	Whole		25.86		41.16	5.81	21.41
Hasan, 2006	Kachki	Corica soborna	Ganges river sprat	Whole		27.33		52.75	8.91	11		Kuakata (Patuakhali)
Hasan, 2006	Mola	Amblypharyngodon microlepis	Mola Carplet	Whole		26.02		49.63	13.13	11.18		Not relevant (Fish Powder)
Hasan, 2006	Tengra	Mystus tengara	Tyangra	Whole		26.42		44.72	16.63	12.21		Solar dried sample took
Hasan, 2016	Tengra	Mystus vittatus		Muscle		13.81		65.02	7.41	12.48
Hasan, 2016	Taki	Channa punctatus		Muscle		15.99		63.68	7.73	11.43 ± 0.45a
Hasan, 2016	Jat punti	Puntius sophore		Muscle		13.24		63.55	6.9	13.17
Hasan, 2016	Guchi baim	Mastacembelus pancalus		Muscle		13.55		62.01	8.57	13.01		Commercially produced fish took into consideration (control)
Hasan, 2016	Tengra	Mystus vittatus	Tyangra	Whole		24.63		56.46	6.17	18.64
Hasan, 2016	Taki	Channa punctatus	Spotted snakehead	Whole		21.43		54.65	6.01	15.76		Not relevant (Fish Powder)
Hasan, 2016	Jat Punti	Puntius sophore	Small freshwater fish	Whole		18.32		42.4	5.15	24.17
Hasan, 2016	Guchi Baim	Mastacembelus pancalus	Zig-zag eel	Whole		23.52		42.08	7.86	23.25		Not relevant
Hasan, 2018	Baim	Mastacembelus sp.	Zig-zag eel	Whole		16.18		61.44	8.55	10.01	1.05	Commercially sun dried
Hossain, 2015	Parshe	Mugil cephalus	Flathead grey mullet	Whole		21.19		68.09	8.22	10.35		Not relevant
Hossain, 2015		Scoliodon shorrakowah	Shark	Whole		23.81		64.06	2.97	8.1
Hossain, 2015	Churi	Trichiurus haumela	Ribbon fish	Whole		24.46		62.36	3.67	9.51
Hossain, 2015	Loitta	Harpodon nehereus	Bombay duck	Whole		21.26		61.25	3.5	15.02
Hossain, 2017	Vetki	Lates calcarifer	Perch	Whole		26.74		40.31	5.03	11.5
Hossain, 2017	Rupchada	Stromateus cinereus	Silver Pomfret	Whole		39.59		32.25	6.75	15.73
Huque, 2013	Chingri	Leander styliferus	Prawns	Whole		17.09	3.8	60	8.89	10.22
Huque, 2013	Loitta	Harpodon nehereus	Bombay duck	Whole		19.31	3.29	56.22	11.1	10.08
Huque, 2013	Chepa	Puntius chola	Swamp Barb	Whole		40.93	3.37	32.61	12.28	10.81
Imtiaz, 2017	Churi	Trichiurus haumela	Ribbon fish	Whole		17.37		56.32	5.93	16.19
Islam, 2006	Churi	Trihiurus haumela	Ribbon fish	Whole		13		67.38	6.18	12.25
Islam, 2006	Vola	Uohnius argentatus	Silver Jew fish	Whole		12.3		64.41	8.13	13.2
Islam, 2006	Loitta	Harpodon nehereus	Bombay duck	Whole		15		57.32	7.92	14.28
Islam, 2007	Chada	Pampus argenteus	Pomfret	Whole		27		58	10.99	4.01
Islam, 2007	Chada	Pampus argenteus	Pomfret	Whole		28		55	11.9	3.4		Not relevant (Fish Powder)
Islam, 2012	Mola	Amblypharyngodon mola	Mola Carplet	Whole		26.6		50.03	12.16	12.19		Not relevant (Fish Powder)
Islam, 2013	Taki	Channa punctata	Spotted snakehead	Whole		34.43	0.37	63.11	4.9	31.63		Not relevant
Islam, 2013	Bele	Glossogobius giuris	Scribbled goby	Whole		33.84	0.97	58.89	7.38	32.77		Marine species took into consideration, not riverine species
Islam, 2013	Punti	Puntius sp.	Small freshwater fish	Whole		31.35	0.25	54.07	16.34	29.34		Sample from Cox'sbazar took
Islam, 2013	Mola	Amblypharyngodon mola	Mola Carplet	Whole		29.25	0.42	45.26	19.83	34.49		Solar dried sample took
Islam, 2020	Churi	Trichiurus lepturus	Ribbonfish	Whole		20.5						Traditionally dried sample took
Islam, 2020	Loitta	Harpadon nehereus	Bombay duck	Whole		24.19
Islam, 2020	Phasa	Setipinna taty	Hairfin Anchovy	Whole		20.34
Islam, 2021	Baila	Awaous guamensis	Scribbled Gobi	Whole		37			1.7	21
Islam, 2021	Tuna	Tunnus albacores	Tuna	Whole		37			1.5	22
Islam, 2021	Bol Koral	Lates calcarifer	Coral	Whole		38			0.86	25
Islam, 2021	Koladia	Otolithoides pama	Pama Croaker	Whole		33			0.93	20
Islam, 2021	Flying fish	Exocoetus sp	Tropical two-wing Flying fish	Whole		36			1.1	19
Islam, 2021	Tak Chanda	Leioganathus eguulus	Common pony fish	Whole		36			2.7	18
Islam, 2021	Rupchanda	Pampus chinensis	Chinese silver pomfret	Whole		37			3.2	26
Islam, 2021	Choi	Lobotes surinamensis	Tripletail	Whole		37			1.9	17
Islam, 2021	Rangachoi	Lutjanus indicus	Snapper	Whole		31			0.63	18
Islam, 2021	Baspata	Paramugil paramatus	Broad mouthed mullet	Whole		35			1.3	19
Islam, 2021	Bol fish	Promicrops laceolatus	Giant grouper	Whole		35			1.4	22		Solar dried fish taken
Islam, 2021	Sundori	Bodianus neilli	Bay of Bengal hog fish	Whole		34			1.3	17		Solar dried fish taken
Islam, 2021	Datina koral	Lates calcarifer	Barramundi	Whole		35			0.47	19		Solar dried fish taken
Jahan, 2017	Chingri	Macrobrachium dayanum	Prawns	Muscle		12.3	5.4	68.5	13.63	0.16		Marine species took into consideration, not riverine species
Jahan, 2017	Mrigel	Cirrnina mrigala	Mrigal	Muscle		13.63	4.85	68.46	15.71	0.44		Not relevant
Jahan, 2017	Rui	Labeo rohita	Rohu	Muscle		11.55	1.75	66.9	19.33	0.24		Not relevant
Jahan, 2017	Silver carp	Hypophthalmicthys molitrix	Silver carp	Muscle		13.95	1.98	62.18	18.65	0.36		Not relevant
Jahan, 2017	Punti	Puntius sophore	Small freshwater fish	Muscle		12.85	19.23	54.31	13.33	0.28
Jahan, 2019	Taki	Channa Punctatus	Spotted snakehead	Whole		14.83		57.5	3.1	21
Jamil, 2017	Loitta	Harpadon nehereus	Bombay Duck	Whole		37.26		32.21	3.51	16.22
Jamil, 2017	Churi	Trichiurus haumela	Ribbon Fish	Whole		35.78		31.64	5.06	12.33
Kar, 2020	Churi	Trichiurus savala	Ribbon Fish	Whole		12.53		77.68	3.59	8.02
Kar, 2020	Ichari	Salmostona bacaila	Sardine	Whole		11.27		71.52	13.73	11.89
Kar, 2020	Loitta	Harpadon nehereus	Bombay Duck	Whole		20.01		69.54	10.6	15.41		Incomplete data
Kar, 2020	Olua	Colia dussumieri	Anchovy	Whole		14.16		69.47	9.27	20.88		Incomplete data
Kar, 2020	Loitta	Harpadon nehereus	Bombay duck	Whole		26.01		69.42	10.04	27.6		Incomplete data
Kar, 2020	Olua	Colia dussumieri	Anchovy	Whole		13.76		67.8	12.88	25.61
Kar, 2020	Loitta	Harpadon nehereus	Bombay Duck	Whole		23.09		65.47	10.04	25.38
Kar, 2020	Churi	Trichiurus savala	Ribbon fish	Whole		27.13		65.42	7.74	21.52
Kar, 2020	Churi	Trichiurus savala	Ribbon Fish	Whole		20.76		63.39	5.54	6.37
Kar, 2020	Phasa	Setipinna phasa	Hairfin Anchovy	Whole		23.49		62.98	6.22	24.83
Kar, 2020	Ichari	Salmostona bacaila	Sardine	Whole		27.42		58.94	23.83	34.16		sample from Cox'sbazar and traditionally dried took into consideration
Kar, 2020	Ichari	Salmostona bacaila	Sardine	Whole		15.62		58.78	23.73	26.76		sample from Cox'sbazar and traditionally dried took into consideration
Kar, 2020	Phasa	Setipinna phasa	Anchovy	Whole		18.92		57.74	21.32	24.09
Kar, 2020	Phasa	Setipinna phasa	Anchovy	Whole		18.92		57.74	21.32	24.09
Kar, 2020	Rupchanda	Pampus chinensis	Silver pomfret	Whole		38.94		55.9	27.74	26.01
Kar, 2020	Rupchanda	Pampus chinensis	Silver Pomfret	Whole		32.59		54.26	22.85	26.76		Sample from Cox'sbazar took
Kar, 2020	Rupchanda	Pampus chinensis	Silver Pomfret	Whole		14.69		52.82	17.35	6.18		Kuakata (Patuakhali)
Kar, 2020	Olua	Colia dussumieri	Anchovy	Whole		18.04		51.33	4.74	31.37
Mahmud, 2019	Bele	Awaous grammepomus	Scribbled Goby	Whole	369.46	6.84	3.4	75.8	5.85	8.1		Location: Cox’bazar
Mahmud, 2019	Taki	Channa punctata	Snakehead	Whole	371.95	6.9	4.66	73.36	6.65	8.43		Location: Chakti
Mahmud, 2019	Punti	Puntius puntio	Puntio barb	Whole	368.47	7.23	3.84	72.9	6.83	9.19		Improved Sun dried
Mahmud, 2019	Rui	Labeo rohita	Rohu	Whole	367.5	8.85	8.21	72.63	7.17	8.21		Traditional Sun dried
Mahmud, 2019	Silver	Hypophthalmichthys molitrix	Silver Carp	Whole	379.61	7.49	6.01	70.8	8.04	7.66		SIS products and traditionally dried took into consideration
Majumdar, 2017(a)	Shol	Channa striatus	Snakehead murrel	Whole		18.75		66.44	6.81	6.49		SIS products and traditionally dried took into consideration
Majumdar, 2017(a)	Bele	Glossogobius giuris	Scribbled Goby	Whole		21.93		62.83	5.98	7.83		SIS products and traditionally dried took into consideration
Majumdar, 2017(a)	Boal	Wallago attu	Wallago	Whole		22.7		61.85	6.21	6.79		Traditionally dried took into consideration
Majumdar, 2017(b)	Taki	Channa punctatus	Spotted snakehead	Whole		21.43		54.65	6.01	15.76		Not relevant (Fish Powder)
Majumdar, 2017(b)	Chapila	Gudusia chapra	Indian River Shad	Whole		26.24		51.48	9.21	13.45
Majumdar, 2017(b)	Punti	Puntius sophore	Small freshwater fish	Whole		18.32		50.4	5.15	16.17
Majumdar, 2018	Tengra	Mystus vittatus	Tyangra	Whole		12.44		61.32	11.65	14.54		Traditionally dried took into consideration
Mansur, 2013	Shol	Channa striatus	Snakehead murrel	Whole		19.17		62.85	4.92	11.11		Traditionally dried took into consideration
Mansur, 2013	Rui	Labeo rohita	Rohu	Whole		20.27		59.32	10.83	12.89		Traditionally dried took into consideration
Mansur, 2013	Boal	Wallago attu	Wallago	Whole		23.12		49.23	11	18.89
Mansur, 2017	Kechki	Amblypharringodon microlepin	Minnows	Whole		20.37		56.2	6.2	19.07
Mansur, 2017	Bozuri Tengra	Mystus tengra	Bagrid cat fish	Whole		18.88		54.3	14.3	12.4
Mansur, 2017	Boal	Wallago attu	Eurasian catfish/Freshwater shark	Whole		23.12		49.23	11.01	18.89
Nurullah, 2006	Dhela	Osteobrama cotio	Cotio fish	Whole		15.86		60.4	14.1	9		Improved Sun dried
Nurullah, 2006	Mola	Amblypharyngodon mola	Mola Carplet	Whole		16		59.6	14.86	11.33		Improved Sun dried
Nurullah, 2006	Tengra	Mystus vitatus	Tyangra	Whole		18.48		58	15.92	12.13		Traditionally dried took
Nurullah, 2006	Punti	Barbides sarana	Small freshwater fish	Whole		17.12		57.9	15.36	10.32
Nurullah, 2006	Batashi	Pseudotropius atherinoides	Indian Batasi	Whole		14.38		57.44	16.26	11
Nurullah, 2006	Chapila	Gudusia chapra	Indian River Shad	Whole		17.02		57.24	14.5	10.45
Prodhan, 2010	Maittya	Scomberomorus guttatus	Spanish Mackerel	Whole		13.2		67.73	8.5	9.7
Rahman, 2016	Punti	Puntius ticto	Small freshwater fish	Whole		22.34		59.45	5.21	11.15
Rahman, 2016	Vola	Otolithes argentatus	Silver Jew Fish	Whole		23.64		52.57	7.02	16.15		Dubla Island (Khulna)
Rana, 2020	Churi	Trichiurus lepturus	Ribbon fish	Whole		19.92		65.78	9.02	5.28		Control dried (and November month) took into consideration
Rana, 2020	Loitta	Harpadon nehereus	Bombay duck	Whole		28.96		55.56	8.06	7.96
Rana, 2020	Chanda	Chanda ranga	Pomfret	Whole		15.66		50.53	13.03	18.6
Rana, 2020	Kachki	Corica soborna	Ganges river sprat	Whole		28.2		49.84	9.15	12.63		Not relevant (Fish Powder)
Rana, 2020	Chapila	Gudusia chapra	Indian River Shad	Whole		27.32		49.6	8.76	14.31
Rana, 2020	Mola	Amblypharyngodon mola	Mola Carplet	Whole		24.85		48.94	10.06	16.12
Rana, 2020	Punti	Puntius sophore	Small freshwater fish	Whole		25.13		48.82	9.84	16.11
Rana, 2020	Batashi	Pseudeutropius atherinoides	Indian Batasi	Whole		27.05		45.8	11.8	15		Sun-dried sample took
Rana, 2020	Tengra	Mystus tengara	Tyangra	Whole		27.52		43.2	12.84	15.22		Solar dried sample took
Rana, 2020	Taki	Channa punctatus	Spotted snakehead	Whole		35.5		42.06	4.2	18.24		Not relevant
Rasul, 2018	Silver carp	Hypophthalmichthys molitrix	Silver Carp	Whole		25.43		61.51	6.21	6.79
Rasul, 2019	Kholisa	Trichogaster fasciata	Banded gourami	Muscle		15.06		53.98	11.02	19.68		Sample from Cox'sbazar took
Rasul, 2021	Kauwa fish	Megalaspis cordyla	Torpedo Scad	Whole		21.3		61.67	6.14	7.8
Shaheen, 2013	Olua	Colia dussumieri	Anchovy	Whole	328	10.3		70.9	4.9	11.9
Shaheen, 2013	Chela	Salmostoma acinaces	Minnow	Whole	412	4.7		64.8	17	13.4
Shaheen, 2013	Rupchanda	Pampus chinensis	Silver pomfret	Whole	349	21.6		62.1	11.2	3.8
Shaheen, 2013	Vetki	Lates calcarifer	Perch	Whole	318	20.1		60.2	8.6	15.9
Siddiky, 2017	Rupchada	Stromateus chinensis	Chinese pomfret	Whole		22.62		60.61	7.35	8.56		Non-irradiated took into consideration
Siddiky, 2017	Churi	Trichiurus haumela	Ribbon fish	Whole		18.66		58.36	11.24	11.22		Non-irradiated took into consideration
Siddiky, 2017	Loitta	Harpodon nehereus	Bombay duck	Whole		17.93		61.53	7.44	12.78		Non-irradiated took into consideration
Siddiky, 2017	Phasa	Engraulis tellara	Hairfin Anchovy	Whole		22.13		52.82	10.4	15.17		Dubla Island (Khulna)
Siddiky, 2017		Strongylura leiura	Banded needle fish	Whole		22.09		50.16	9.17	17.57		Not relevant (Fish Powder)
Siddique, 2011	Churi	Lepturacanthus savala	Ribbon fish	Whole		13.81	1.64	71.9	7.79	4.86
Siddique, 2011	Poa	Johnius dussumieri	Sin croaker	Whole		20.76	2.94	64.39	5.54	6.37		Tunnel dryer type 1 product took into consideration
Siddique, 2011	Loitta	Harpodon nehereus	Bombay duck	Whole		22.22	4.11	58.33	7.78	7.56		Sun dried, salted took
Sultana, 2008	Churi	Trichiurus haumela	Ribbon fish	Muscle		16.19		65.82	10.28	7.94		Solar dried taken
Sultana, 2008	Vola	Johnius argentatus	Silver jew fish	Muscle		19.71		57.64	15.4	7.69		Solar dried taken
Sultana, 2008	Loitta	Harpodon nehereus	Bombay duck	Muscle		14.05		69.21	6.92	8.8		Solar dried taken
					9	180		164	177	172
					362.666	21.5972		56.6304	9.72746	14.2927
					412	43.03		77.68	27.74	36.2
					318	4.7		26.73	0.47	0.16
					Salmostoma acinaces	Stromateus chinensis		Trichiurus savala	Pampus chinensis	Mystus tengra
					Lates calcarifer	Salmostoma acinaces		Tenualosa ilisha	Lates calcarifer	Macrobrachium dayanum

## Sheet: Minerals
Author, year (for example Shaheen, 2013)	Local name of the fish	Scientific name	Common name/English name	Tissue sampled (whole, head, muscle, bone, fin etc.)	Iron (mg/100g)	Zinc (mg/100g)	Calcium (mg/100g)	Iodine (mcg/100g)	Selenium (mcg/100g)	Phosphorus (mg/100g)	Magnesium (mg/100g)	Sodium (mg/100g)	Potassium (mg/100g)	Manganese (mg/100g)	Sulphur (mg/100g)	Copper (mg/100gm)	Ti (mg/100gm)	Ni (mg/100gm)	As (mg/100gm)	Rb (mg/100gm)	Sr (mg/100gm)	Cd (ppm)	Pb (ppm)	Cr (ppm)	Remarks
Akther, 2018	Punti	Puntius ticto	Small freshwater fish	Muscle	20.25		2530			2220
Akther, 2018	Khailsa	Colisa fasciata	Giant gourami	Muscle	24.65		2510			2930
Akther, 2018	Bacha	Eutropiichtheys vacha	Batchwa vacha	Muscle	28.8		2500			2500
Akther, 2018	Kachki	Corica soborna	Ganges river sprat	Muscle	31		2490			2900
Akther, 2018	Bele	Glossogobius giuris	Scribbled goby	Muscle	21.41		1660			2880															Heavy metal took as Mineral
Debnath, 2018	Ilish	Tenualosa ilisha	Hilsa	Caudal	6.44		631.81			118.08															Not relevant (Fish Powder)
Debnath, 2018	Ilish	Tenualosa ilisha	Hilsa	Abdomen	5.63		446.84			98.86															Heavy metal took as Mineral
Farid, 2016	Tengra	Mystus tengra	Tyangra	Muscle	5.025	3.575	976.25				331			0.722		0.475
Farid, 2016	Taki	Channa punctatus	Spotted snakehead	Muscle	4.99	3	578.25				126.5			0.775		0.62									Not relevant (Fish Powder)
Farid, 2016	Shol	Channa striata	Snakehead murrel	Muscle	2.8	2.275	219.5				43.687			0.525		0.3									Heavy metal took as Mineral
Hossain, 2017	Rupchada	Stromateus cinereus	Silver Pomfret	Whole		2.493										0.115						0.68	8.43	5.85	Heavy metal took as Mineral
Hossain, 2017	Vetki	Lates calcarifer	Perch	Whole		2.38										0.104						0.65	6.28	5.6	Heavy metal took as Mineral
Huque, 2013	Chingri	Leander styliferus	Prawns	Whole			410			792															Heavy metal took as Mineral
Huque, 2013	Chepa	Puntius chola	Swamp Barb	Whole			396			743															Heavy metal took as Mineral
Huque, 2013	Loitta	Harpodon nehereus	Bombay duck	Whole			165			360															Heavy metal took as Mineral
Jahan, 2017	Chingri	Macrobrachium dayanum	Prawns	Muscle	9.5		254			160															Kuakata (Patuakhali)
Jahan, 2017	Silver carp	Hypophthalmicthys molitrix	Silver carp	Muscle	4.3		252			125															Not relevant (Fish Powder)
Jahan, 2017	Punti	Puntius sophore	Small freshwater fish	Muscle	4.3		251			191															Not relevant (Fish Powder)
Jahan, 2017	Mrigel	Cirrnina mrigala	Mrigal	Muscle	18.4		250			185															Not relevant (Fish Powder)
Jahan, 2017	Rui	Labeo rohita	Rohu	Muscle	9.1		248			94															Not relevant (Fish Powder)
Jamil, 2017	Loitta	Harpadon nehereus	Bombay Duck	Whole		5.538										0.221						0.824	8.281	8.38	Heavy metal took as Mineral
Jamil, 2017	Churi	Trichiurus haumela	Ribbon Fish	Whole		1.995										0.1401						0.485	5.465	6.969	Heavy metal took as Mineral
Kar, 2020	Rupchanda	Pampus chinensis	Silver pomfret	Whole	14.683	4.642										0.084			3.21				0.29		Heavy metal took as Mineral
Kar, 2020	Churi	Trichiurus savala	Ribbon fish	Whole	3.604	3.674										0.099			2.227				0.005		Heavy metal took as Mineral
Kar, 2020	Loitta	Harpadon nehereus	Bombay duck	Whole	15.308	3.108										0.068			2.31				0.68		Heavy metal took as Mineral
Kar, 2020	Loitta	Harpadon nehereus	Bombay duck	Whole	16.018	2.86										0.051			1.67			0.001	0.51		Heavy metal took as Mineral
Kar, 2020	Loitta	Harpadon nehereus	Bombay duck	Whole	11.685	2.802										0.057			0.146				0.003
Kar, 2020	Churi	Trichiurus savala	Ribbon fish	Whole	6.134	2.757										0.084			8.41				0.84
Kar, 2020	Churi	Trichiurus savala	Ribbon fish	Whole	4.803	2.491										0.057			0.95				0.57		Heavy metal took as Mineral
Kar, 2020	Rupchanda	Pampus chinensis	Silver pomfret	Whole	3.731	2.049										0.023			0.163				0.0009		Heavy metal took as Mineral
Kar, 2020	Rupchanda	Pampus chinensis	Silver pomfret	Whole	6.667	1.695										0.03			1.47				0.32		Heavy metal took as Mineral
Mahmud, 2019	Rui	Labeo rohita	Rohu	Whole	9		254			140									0.000127			0.00335	0.0131		Dubla Island (Khulna)
Mahmud, 2019	Silver	Hypophthalmichthys molitrix	Silver Carp	Whole	15		253			93												0.0043	0.01447		Kuakata (Patuakhali)
Mahmud, 2019	Punti	Puntius puntio	Puntio Barb	Whole	13		252			120												0.00294	0.00951		Dubla Island (Khulna)
Mahmud, 2019	Bele	Awaous grammepomus	Scribbled Goby	Whole	4		243			113												0.00398	0.01239		Not relevant (Fish Powder)
Mahmud, 2019	Taki	Channa punctata	Snakehead	Whole	7		231			73												0.00397	0.0106		Heavy metal took as Mineral
Mansur, 2013	Rui	Labeo rohita	Rohu	Whole															0.0001			0.053		0.025	Heavy metal took as Mineral
Mansur, 2013	Shol	Channa striatus	Snakehead murrel	Whole															0.0003			0.089		0.045	heavy metal took as Mineral
Mansur, 2013	Boal	Wallago attu	Wallago	Whole															0.0004			0.097		0.068	Heavy metal took as Mineral
Mansur, 2017	Bozuri Tengra	Mystus tengra	Bagrid cat fish	Whole		19.297										0.264						0.66	8.18	8.82
Mansur, 2017	Kechki	Amblypharringodon microlepin	Minnows	Whole		10.453										0.241						1.1	10.44	23.92	Heavy metal took as Mineral
Mansur, 2017	Boal	Wallago attu	Eurasian catfish/Freshwater shark	Whole		2.628										0.118						0.99	8.68	26.99	Heavy metal took as Mineral
Shaheen, 2013	Chela	Salmostoma acinaces	Minnow	Whole	6.7		3590			844			1430
Shaheen, 2013	Fesha	Colia dussumieri	Anchovy	Whole	18		1680			772	138		982			0.71
Shaheen, 2013	Vetki	Lates calcarifer	Perch	Whole	3	0.23	939			180	181	84	271			0.06									Not relevant (Fish Powder)
Sharif, 1991	Olua	Coilia neglecta	Anchovy	Muscle	45.1	2.447	3104.6				319		889	0.822		0.395		0.719		2.785	1.663	0.15	1.67
Sharif, 1991	Bata	Cirrhina reba	Bata	Muscle	39.999	2.537	2776.4				301		895	1.114		0.417		0.758		0.328	8.075	0.17	2.58
Sharif, 1991	Loitta	Harpadon nehereus	Bombay duck	Muscle	38.144	3.389	2333.3				346		830.3	0.666		0.354		0.701		0.574	3.325	0.01	2.21
Sharif, 1991	Phoua	Johnius argantus	Pama croaker	Muscle	27.833	2.11	1947.7				262.4		1188.2	0.562		0.354		0.644		1.164	3.563	0.13	1.84
Sharif, 1991	Churi	Trichiurus lepturus	Ribbon Fish	Muscle	29.11	2.649	1249.6				367.1		1234.5	0.501		0.468		0.644		1.565	1.575	0.13	2.1
Sharif, 1991	Fhassa	Setipinna phasa		Muscle	6.055	1.886	443.1				200.2		703.5	0.5525		0.333		0.6439		1.785	6.035	0.009	2.035		Heavy metal took as Mineral
Sharif, 1991	Rupchanda	Stromatetts sinensis		Muscle	9.54	5.1	190.7						1169.3	0.711		0.2		1.52		1.52	7.64				Heavy metal took as Mineral
Sharif, 1991	Rita	Rit rita	Rita	Muscle	18.21	7.88	33.7						491.2	0.407		0.154		1.14		1.47	2.3
Sharif, 1993	Fatra	Racouda russelliana	Herring	Muscle	11.891	4.125	1588.3				241.8	858	1326.3	0.902		0.304		0.171		0.341	7.226	0.07	4.03		Heavy metal took as Mineral
Sharif, 1993	Tapashi	Polynemus paradiseus	Long thread tassel fish	Muscle	3.773	3.575	1124.3				124.9	275	1182.9	0.32		0.082		0.136		0.298	6.728	0.06	0.77
Sharif, 1993	Choukya	Ilisha megaloptera	Jewellew shad	Muscle	10.361	3.208	879.1				171.8	2640	1147.1	0.32		0.091		0.147		0.128	2.243	0.12	3.25		Not relevant (Fish Powder)
Sharif, 1993	Gura Chingri	Leander styliferus	Tiny shrimp	Muscle	5.871	5.592	537.8				182.9	336	1003.7	0.446		1.109		0.257		0.468	2.243	0.06	0.58		Not relevant (Fish Powder)
Sharif, 1993	Pangas	Pangasius pangasius	Catfish	Muscle	11.371	5.592	482				52	3488	1111.2	0.902		0.774		0.611		0.256	2.243	0.13	3.09		Heavy metal took as Mineral
Sharif, 1993	Kata mach	Osteogeniosus militaris	Sea Cat Fish	Muscle	11.044	11.936	316.3				154.1	576	1218.8	0.311		0.437		0.135		0.426	1.495	0.06	1.74		Kuakata (Patuakhali)
Sharif, 1993	Vetki	Lates calcarifer	Cock-up	Muscle	11.756	3.3	264				186.2	528	1720.6	0.476		0.076		0.073		0.234	1.495	0.09	0.68		Dubla Island (Khulna)
Sharif, 1993	Maitya	Scomberomorus guttatum	Spanish mackerel	Muscle	7.651	4.85	208.3				165.1	396	1290.5	0.146		0.164		0.098		0.149		0.04	1.55		Heavy metal took as Mineral
Sharif, 1993	Champa	Rastrelliger kanagurta	Indian mackerel	Muscle	6.057	2.567	208.3				165.1	384	1182.9	0.301		0.469		0.183		0.128	5.233	0.1	1.55		Heavy metal took as Mineral
Sharif, 1993	Lakhua	Polynemus indicus	Indian salmon	Muscle	8.714	11.183	104.5				185.2	2908	1003.7	0.67		0.046		0.073		0.426		0.08	0.58
					50	38	44			23	21	11	21	21		39		18	13	18	16	32	37	10
					13.1482	4.31232	954.606			810.084	202.142	1133.91	1060.56	0.578643		0.260208		0.480772	1.5813	0.780278	3.94262	0.220517	2.41324	8.6667
					45.1	19.297	3590			2930	367.1	3488	1720.6	1.114		1.109		1.52	8.41	2.785	8.075	1.1	10.44	26.99
					2.8	0.23	33.7			73	43.687	84	271	0.146		0.023		0.073	0.0001	0.128	1.495	0.001	0.0009	0.025
					Coilia neglecta	Mystus tengra	Salmostoma acinaces			Colisa fasciata	Trichiurus lepturus	Pangasius pangasius	Lates calcarifer	Cirrhina reba		Leander styliferus		Stromatetts sinensis	Trichiurus savala	Coilia neglecta	Cirrhina reba	Amblypharringodon microlepin	Amblypharringodon microlepin	Wallago attu
					Channa striata	Lates calcarifer	Rit rita			Channa punctata	Channa striata	Lates calcarifer	Lates calcarifer	Scomberomorus guttatum		Pampus chinensis		Lates calcarifer	Labeo rohita	Ilisha megaloptera	Osteogeniosus militaris	Harpadon nehereus	Pampus chinensis	Labeo rohita

## Sheet: Vitamins
Author, year (for example Shaheen, 2013)	Local name	Scientific name	Common name/English name	Tissue sampled (whole, head, muscle, bone, fin etc.)	Vitamin B12 (mcg/100g)	Vitamin D (mcg/100g)	Vitamin E (mg/100g)	Folate (mcg/100g)	Vitamin A1 (mcg/100g)	Vitamin A2 (mcg/100g)	Total vitamin-A/RAE eq. (mcg/100g)	Thiamin/B1 (mg/100g)	Riboflavin/B2 (mg/100g)	Niacin eq/ B3 (mg/100g)	Vitamin B6 (mg/100g)	Vitamin C (mg/100g)	Add column for thers
Shaheen, 2013	Fesha	Engraulis tellara	Anchovy	Whole			0.58	30	15		15	0.19	0.86		0.482
Shaheen, 2013	Vetki	Lates calcarifer	Perch	Whole		4.7		14				0.13	0.5	2	0.378
								22				0.16	0.68		0.43

## Sheet: Amino acid profile
Author(s)	Local name	Scientific name	Common name	mg/100 g muscle
				Histidine	Isoleucine	Phenylalanine	Lysine	Valine	Leucine	Threonine	Tryptophan	Tyrosine	Methionine	Glutamic acid	Aspartic acid	Arginine	Glycine	Alanine	Serine	Proline	Cysteine	Asparagine	Glutamine	Remarks

## Sheet: Fatty acid profile
Author, year (for example Shaheen, 2013)	Local name of the fish	Scientific name	Common name/English name	Tissue sampled (whole, head, muscle, bone, fin etc.)	Total Fat/Lipid (g/100g)	Total SFA (g/100g)	Total MUFA (g/100g)	Total PUFA (g/100g)	Sum n-3 (g/100g)	Sum n-6 (g/100g)	EPA (g/100g)	DHA (g/100g)	Lauric Acid (g/100g)	Myristic Acid (g/100g)	Pentadecyclic Acid (g/100g)	Palmitic Acid (g/100g)	Palmitoleic Acid (g/100g)	Margaric (g/100g)	Stearic Acid (g/100g)	Oleic Acid (g/100g)	Linoleic Acid (g/100g)	Linolenic Acid (g/100g)	Arachidic Acid (g/100g)	C20:1 (g/100g)	C20:2 (g/100g)	C20:3 (g/100g)	Arachidonic Acid (g/100g)	EPA (g/100g)	Eruic Acid (g/100g)	DHA (g/100g)	Nervonic Acid (g/100g)	Remarks
Islam, 2021	Baila	Awaous guamensis	Scribbled Gobi	Whole									5.2	11.6		62.25	10.8		6.4	3.9												Incomplete data
Islam, 2021	Tuna	Tunnus albacores	Tuna	Whole									11.8	16.32		41.2	8.9		4	14.6												Incomplete data
Islam, 2021	Bol Koral	Lates calcarifer	Coral	Whole									2.62	5.17		48.9	26.8		2.79	22.8												Incomplete data
Islam, 2021	Koladia	Otolithoides pama	Pama Croaker	Whole									5.4	15.88		63.56	1.8		9.87													Incomplete data
Islam, 2021	Flying fish	Exocoetus sp	Tropical two wing Flying fish	Whole									5.9	5		54.23			10.22	20.78												Incomplete data
Islam, 2021	Tak Chanda	Leioganathus eguulus	Common pony fish	Whole									10	9		40	8		9	15												Incomplete data
Islam, 2021	Rup Chanda	Pampus chinensis	Chinese silver pomfret	Whole									7	5		49	17		16	16												Incomplete data
Islam, 2021	Choi	Lobotes surinamensis	Tripletail	Whole									6.4	8.2		49.8	18.1		3.5	13.4												Incomplete data
Islam, 2021	Rangachoi	Lutjanus indicus	Snapper	Whole									4.1	18.8		52	6		5	9												Incomplete data
Islam, 2021	Baspata	Paramugil paramatus	Broad-mouthed mullet	Whole									2.8	15.8		52.6	15.3		12	6.1												Incomplete data
Islam, 2021	Bol fish	Promicrops laceolatus	Giant grouper	Whole									6	12		47.3	10.56		5.2	8.9												Incomplete data
Islam, 2021	Sundori	Bodianus neilli	Bay of Bengal hog fish	Whole									2.5	11		50	7.6		5.5	10												Incomplete data
Islam, 2021	Datina koral	Lates calcarifer	Barramund	Whole									11	8.2		48.3	7.5		8.8	6.5												Incomplete data
Rasul, 2021	Kauwa fish	Megalaspis cordyla	Torpedo Scad	Whole		1.787	5.383	2.674						0.167		0.959			0.642	0.511	0.052	0.019	0.019					0.229		0.934		Can be found more data
													13	14		14	12		14	13
													12	10.1526		47.1499	11.53		7.06586	11.3455
													11	18.8		63.56	26.8		16	22.8
													10	0.167		0.959	1.8		0.642	0.511
													9
